# Supplementary material for: Aqueous synthesis of protectant-free copper nanocubes by a disproportionation reaction of Cu2O on synthetic saponite
Source: Royal Society of Chemistry journal article supplement (doi:10.1039/c8cc03182g), 2018-01-01
Supplement: c8cc03182g1.pdf [file c8cc03182g1.pdf]

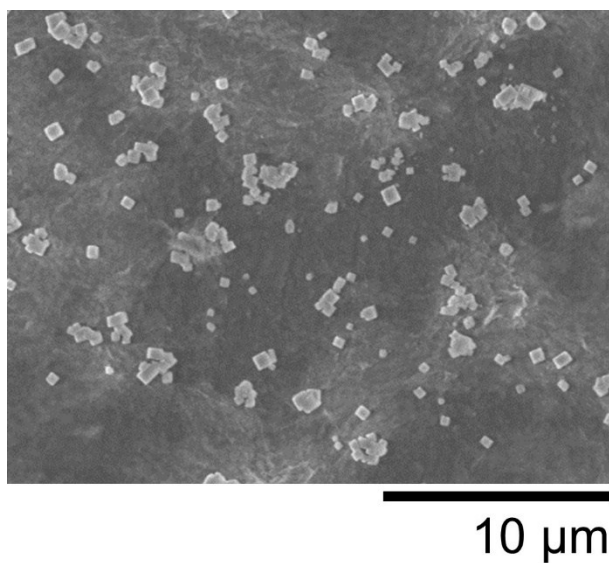

Figure S1. A low-magnification SEM image of Cu-Sapo obtained by the UV irradiation for 220 min.

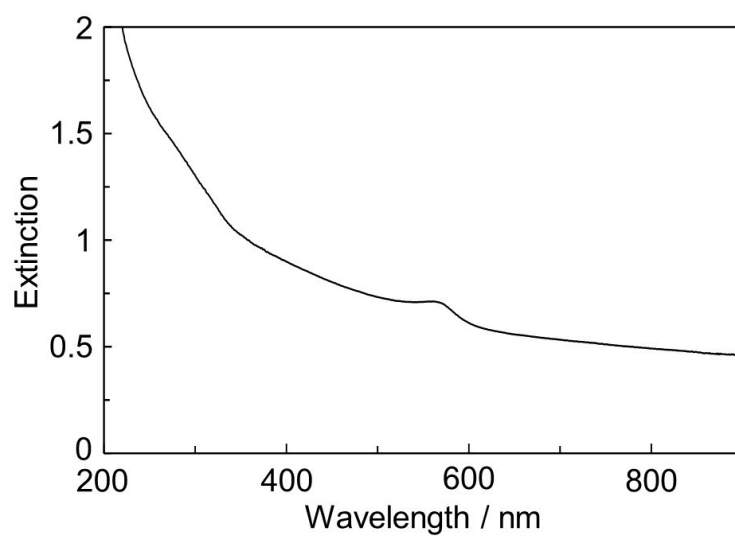

Figure S2. A UV-vis extinction spectrum of Cu-Sapo obtained by the UV irradiation for 220 min.

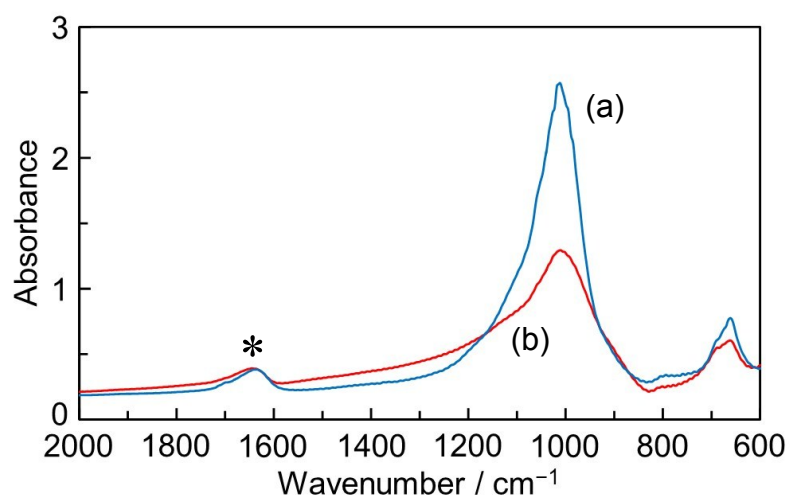

Figure S3. IR spectra of (a) Cu-Sapo and (b) Sapo, respectively. The band with an asterisk is due to H<sub>2</sub>O.

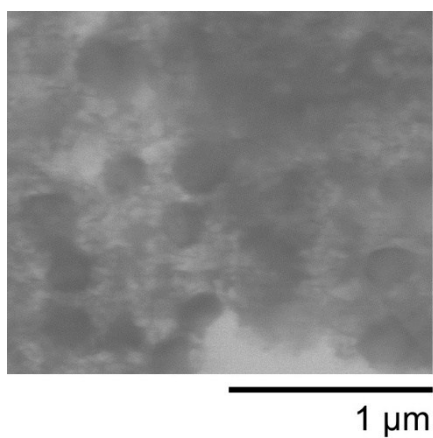

Figure S4. A STEM image of Cu-Sapo obtained by the UV irradiation for 150 min.
